# Supplementary material for: Engineering and systems-level analysis of Pseudomonas chlororaphis for production of phenazine-1-carboxamide using glycerol as the cost-effective carbon source
Source: PubMed Central journal article supplement (PMC5934903; doi:10.1186/s13068-018-1123-y), 2018-05-04

**Additional file 1. Culture profiles of HT66LR.**

*P.chlororaphis* HT66LR

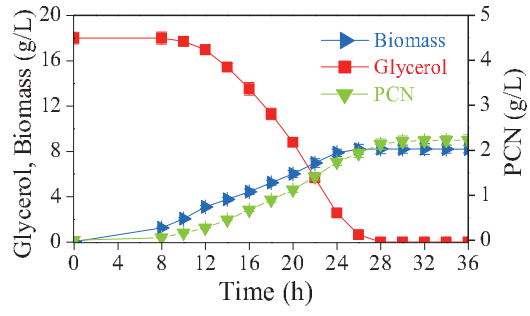

Supplement: 13068_2018_1123_MOESM1_ESM.pdf [file 13068_2018_1123_MOESM1_ESM.pdf]
