# Supplementary material for: Engineering and systems-level analysis of Pseudomonas chlororaphis for production of phenazine-1-carboxamide using glycerol as the cost-effective carbon source
Source: PubMed Central journal article supplement (PMC5934903; doi:10.1186/s13068-018-1123-y), 2018-05-04
Supplement: 13068_2018_1123_MOESM2_ESM.pdf [file 13068_2018_1123_MOESM2_ESM.pdf]

**Additional file 2.**  $^{13}\text{C}$ -labeling trajectories of selected intracellular metabolites after the introduction of  $[\text{U-}^{13}\text{C}]$ glycerol at the exponential phase. **a** Mass isotopomer abundances after correction for natural isotopic abundances. **b** Average  $^{13}\text{C}$ -enrichments calculated using the formula  $(\frac{1}{N}) \sum_{i=1}^N Mi \times i$ , where  $N$  is the number of carbon atoms in the metabolite and  $Mi$  is the fractional abundance of the  $i$ th mass isotopomer. The solid lines (HT66) and dashed lines (HT66LSP) illustrate the measured labeling trends.

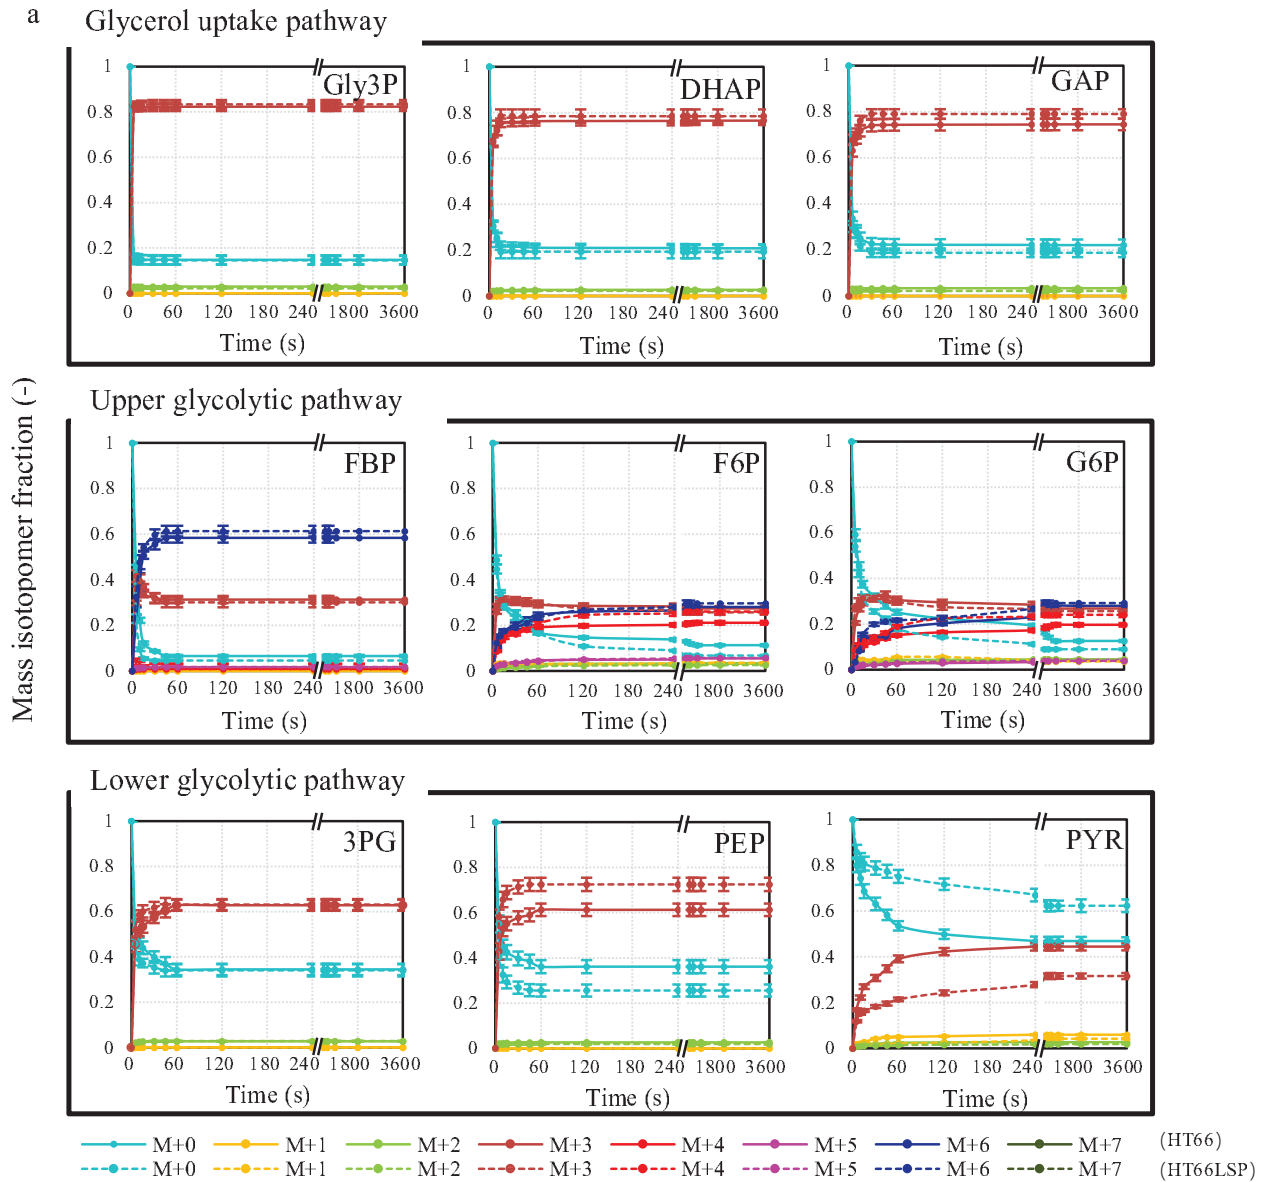



b

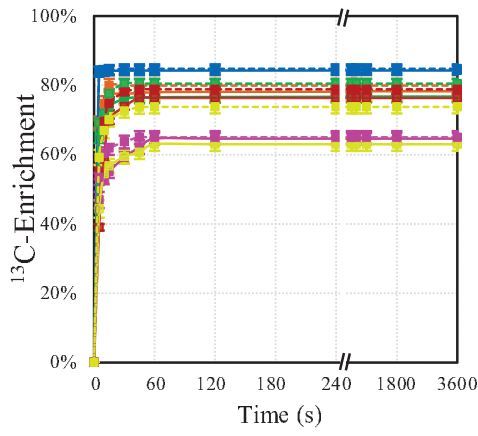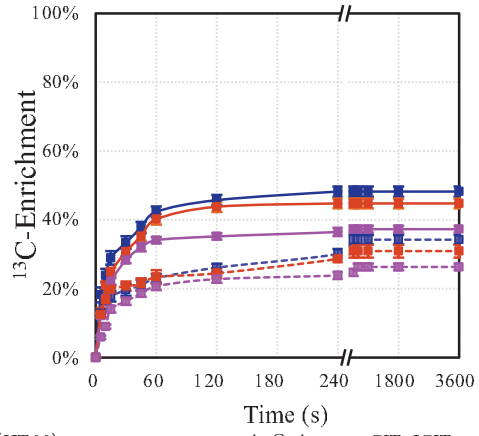

■ Gly3P ■ DHAP ■ GAP ■ FBP ■ 3PG ■ PEP (HT66)

■ PYR ■ AcCoA ■ CIT+ICIT (HT66LSP)

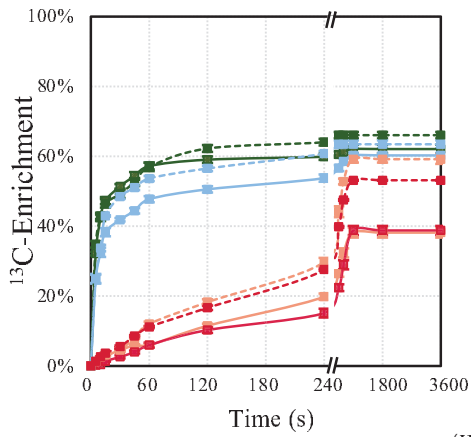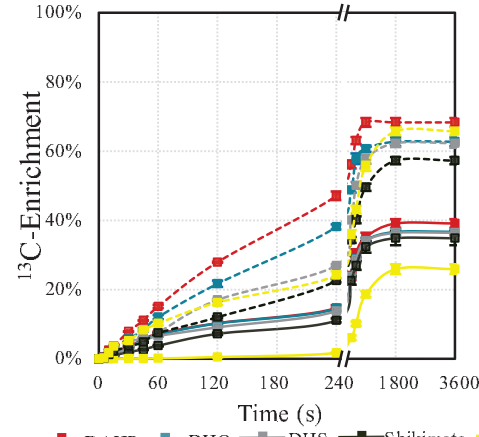

■ F6P ■ G6P ■ R5P ■ S7P (HT66)

■ DAHP ■ DHQ ■ DHS ■ Shikimate ■ DHHA (HT66LSP)
