# Supplementary material for: Engineering and systems-level analysis of Pseudomonas chlororaphis for production of phenazine-1-carboxamide using glycerol as the cost-effective carbon source
Source: PubMed Central journal article supplement (PMC5934903; doi:10.1186/s13068-018-1123-y), 2018-05-04
Supplement: 13068_2018_1123_MOESM3_ESM.pdf [file 13068_2018_1123_MOESM3_ESM.pdf]

**Additional file 3** Primers used in this study.

| Primer                    | Sequence                                   |
|---------------------------|--------------------------------------------|
| Primers for gene deletion |                                            |
| <i>lon</i> -F1            | CGGAATTCGACTGCTGGTTTGACAGAAGG              |
| <i>lon</i> -R1            | GGATAACCATGTGCGGATAA                       |
| <i>lon</i> -F2            | TTATCCGCACATGGTTATCCTCCTTGACAGCTTTTATAGAGC |
| <i>lon</i> -R2            | GCTCTAGAGCCCAGAAACGGTTGTACTTCAA            |
| <i>parS</i> -F1           | CGGGATCCCGATGGATAACCCGGGTCTTGG             |
| <i>parS</i> -R1           | CTAGAGCTCCACGCGAATG                        |
| <i>parS</i> -F2           | CATTTCGCGTGGGAGCTCTAGAGGTCGAGGTGACGGATTTCG |
| <i>parS</i> -R2           | CCCAAGCTTGACTTCTGACGCTATCGCGGAAC           |
| <i>parR</i> -F1           | GAGAGGATCCCACCAGCGCAGCGAGAAAGACATAG        |
| <i>parR</i> -R1           | AACAGATAGCCCTTGCCCCAAAACCGTGTTGGGACAGGAA   |
| <i>parR</i> -F2           | TGGGGCAAGGGCTATCTGTT                       |
| <i>parR</i> -R2           | GAGAAAGCTTCTGGACGAAGAACTGGGCAA             |
| <i>psrA</i> -F1           | GCGGGATCCGGTCCAAACCGACTGCCAACA             |
| <i>psrA</i> -R1           | CAGGTGCGTGAGCTGAGTGC                       |
| <i>psrA</i> -F2           | ACTCAGCTCACGCACCTGATGGCTACTCCGCCTGACAAA    |
| <i>psrA</i> -R2           | CCCAAGCTTCCGATTGATGTTGCAGGACTCTTC          |
| Primers for qRT-PCR       |                                            |
| <i>glpK</i> -F            | TGCACCATGACCAGGTAGCC                       |
| <i>glpK</i> -R            | GCCAGACGATGGCGTTGTAG                       |
| <i>glpD</i> -F            | CGACCTGAAACTGGACTCGC                       |
| <i>glpD</i> -R            | ACGATGCGCTGGTCTTCATT                       |
| <i>tpiA</i> -F            | AGCCATTCGTGAGCAGTTGG                       |
| <i>tpiA</i> -R            | GAACAGTTCGACCGCATTGG                       |
| <i>zwf</i> -F             | CTGGAGGAGGAACATGCGAA                       |
| <i>zwf</i> -R             | TGCCGGTACGCAGGTAGAAC                       |
| <i>gnd</i> -F             | TCACAACGGCATCGAGTACG                       |
| <i>gnd</i> -R             | GACGTTGAGATCGAAGCGCT                       |
| <i>pykF</i> -F            | GGACTACGTGGCCGTTTCCT                       |
| <i>pykF</i> -R            | CGCTCGATCTTGCTACCAG                        |
| <i>aceE</i> -F            | TGAAGACCGCGCTCATTACC                       |
| <i>aceE</i> -R            | CGGAATGGTGTGCGATAGG                        |
| <i>gltA</i> -F            | TTTTAACCGGCACCGTTGGT                       |
| <i>gltA</i> -R            | GCAGGAGGCAGTCGACATGA                       |
| <i>icd</i> -F             | GCGTACCGAAGAACCCGATC                       |
| <i>icd</i> -R             | ATGCTTTTTCCACTGCAGCG                       |
| <i>sucA</i> -F            | TGCTGCCACACGGTTATGAA                       |
| <i>sucA</i> -R            | GGCATGCAGACCTGGATGTT                       |
| <i>sucC</i> -F            | ACTGGTCAACATCTTCGGCG                       |
| <i>sucC</i> -R            | GCCTTCAAGGCGAACAACAA                       |
| <i>gacA</i> -F            | TCAAGTCATTCCAGCCGTCC                       |
| <i>gacA</i> -R            | TCTGGCAGCCGACAATCATC                       |
| <i>gacS</i> -F            | GGGCGGTTATTTACCTGGA                        |
| <i>gacS</i> -R            | GATACGTTCCAGTAGGGCGG                       |
| <i>phzI</i> -F            | CAGCACCATGGAGCGCTATT                       |
| <i>phzI</i> -R            | CGAGAGTTTGATGGCGAGGA                       |

|               |                       |
|---------------|-----------------------|
| <i>phzR-F</i> | CGGTGAAGCACAGCAAAGTC  |
| <i>phzR-R</i> | GCAAACGCCTTGGTCATCAG  |
| <i>phzA-F</i> | GTACATGCGCACTAACGGCA  |
| <i>phzA-R</i> | AGCATTTCTCCAGCCATTTCG |
| <i>phzB-F</i> | GCGCCGCCATGAACTATTTA  |
| <i>phzB-R</i> | AAACAGCATGTTTCGGCCAAC |
| <i>phzC-F</i> | TTGGCGATGTTGAATTGCCG  |
| <i>phzC-R</i> | CAGGCCGGTGAACCTATGAG  |
| <i>phzD-F</i> | CGACCTGCCCATCAACCTC   |
| <i>phzD-R</i> | CCACTTGTTACGCAGGG     |
| <i>phzE-F</i> | CCGACGAGCTGTACATGGTG  |
| <i>phzE-R</i> | GCGCCATTTTCCTTGAGGTAA |
| <i>phzF-F</i> | ACCGTGCCTTGTGCAACTTC  |
| <i>phzF-R</i> | ATCCTCGACCACCCCATAGG  |
| <i>phzG-F</i> | TGAAGAGCTCACGGATGTCG  |
| <i>phzG-R</i> | TCAAGGCGCAACTCAAACAC  |
| <i>phzH-F</i> | GGCGAGGTGTACAACCACGA  |
| <i>phzH-R</i> | CAGATAGGCGTGCAGGACCA  |

---
